# Supplementary material
Source: publisher figshare collection journal article supplement (https://tandf.figshare.com/ndownloader/files/15016763)
Supplement: Supplementary file 1 [file 15016763]

**Breeding in the** **Gray-headed Tody-Flycatcher (Aves: Tyrannidae)** **with comments on** **geographical variation in reproductive traits within the genus *Todirostrum***

Dalila de Fátima Ferreira, Marla Mendes de Aquino, Neander Marcel Heming, Miguel Ângelo Marini, Felipe Sá Fortes Leite, Leonardo Esteves Lopes

**Supplemental online material**

**Table S1.** Records of the Gray-headed Tody-Flycatcher *Todirostrum poliocephalum* nests, eggs, nestlings, and juvenile birds obtained from the following websites (last search on January 2018): WikiAves (https://www.wikiaves.com), eBird (https://ebird.org), Macaulay Library (https://www.macaulaylibrary.org), and Internet Bird Collection (https://www.hbw.com/ibc). All records are from Brazil.

| **Month** | **Day** | **Municipality** | **State** | **Stage** | **Photo ID** | **Author** |
| --- | --- | --- | --- | --- | --- | --- |
| August | 7 | Rio de Janeiro | RJ | Nest | WA178561 | C. Canto |
| August | 12 | Cariacica | ES | Hatching | WA1047155 | R. Doni |
| August | 19 | Jequié | BA | Building | WA2243643 | S. Vitorino |
| August | 20 | Timbó | SC | Nest | WA721216 | W. Leitzke |
| August | 21 | Santa Maria Madalena | RJ | Building | WA1059320 | S. Araújo |
| August | 24 | Niterói | RJ | Juvenile birds | WA739276 | G. Duckworth |
| August | 29 | Rio de Janeiro | RJ | Building | WA360736 | S. Castro |
| August | 30 | Cachoeiras de Macacu | RJ | Building | WA302980 | M. Patrikeev |
| September | 5 | Lindóia | SP | Building | WA492424 | S. Betkowski |
| September | 2 | Brusque | SC | Hatching | WA2260962 | G. Gonzaga |
| September | 3 | Macaé | RJ | Building | WA1822247 | A. Vidal |
| September | 4 | São Lourenço | MG | Nest | WA2264208 | M. Porto 2 |
| September | 7 | Rio de Janeiro | RJ | Building | WA257797 | F. Malerba |
| September | 9 | Rio de Janeiro | RJ | Nestlings | ML34632981 | S. Loewen |
| September | 9 | Camacan | BA | Building | WA1486685 | S. F. Linhares |
| September | 10 | Campinas | SP | Building | WA55050 | J. Carlos |
| September | 12 | Mongaguá | SP | Juvenile birds | WA1093832 | W. Mello |
| September | 12 | Mongaguá | SP | Juvenile birds | WA1082597 | C. Ghirelli |
| September | 12 | Rio de Janeiro | RJ | Building | WA1834453 | S. Porto |
| September | 13 | Rio de Janeiro | RJ | Hatching | WA1247 | S. Henrique |
| September | 15 | Santa Cruz da Conceição | SP | Building | WA1904110 | N. Marçal |
| September | 15 | Morretes | PR | Building | WA202945 | R. Cirino |
| September | 15 | Cachoeiras de Macacu | RJ | Hatching | WA351346 | M. Patrikeev |
| September | 16 | Pindamonhangaba | SP | Nest | WA1096106 | D. Berbare |
| September | 19 | Rio de Janeiro | RJ | Nestlings | WA58113 | S. Henrique |
| September | 20 | Sabinópolis | MG | Building | WA1862884 | D. Pinho |
| September | 21 | Corupá | SC | Nest | WA1509562 | Z. Riedtmann |
| September | 21 | Rio de Janeiro | RJ | Building | WA210605 | A. Valente |
| September | 23 | Blumenau | SC | Nestlings | WA1846716 | N. M. Pereira |
| September | 24 | Blumenau | SC | Nestlings | WA1847089 | J. Muller |
| September | 25 | Itatiba | ES | Nest | WA208822 | A. Pretti |
| September | 25 | Esmeraldas | MG | Building | WA452684 | L. David |
| September | 26 | Ubatuba | SP | Juvenile birds | WA1098955 | A. Ameno |
| September | 26 | Bofete | SP | Building | WA1105518 | R. A. Bonança |
| September | 28 | Ubatuba | SP | Nest | WA455712 | W. Buzoni |
| September | 29 | Rio de Janeiro | RJ | Building | WA759364 | G. Serpa |
| September | 30 | Pedro Leopoldo | MG | Building | WA1106514 | T. Drumond |
| October | 2 | Jacareí | SP | Building | WA213300 | J. Mattos |
| October | 5 | São Paulo | SP | Building | WA2313052 | D. Brazil |
| October | 6 | Resende | RJ | Building | WA1474032 | G. P. de Paula |
| October | 10 | Juiz de Fora | MG | Building | WA2317787 | L. Lopes |
| October | 10 | Itanhaém | SP | Building | WA250720 | R. Gruijters |
| October | 12 | Matão | SP | Nest | WA2319726 | R. Batigalhia |
| October | 12 | Avaré | SP | Nest | WA1120084 | R. Milani |
| October | 14 | Morretes | PR | Building | WA2322478 | G. Azeredo |
| October | 15 | Carmo da Cachoeira | MG | Nest | WA1120182 | A. V. de Lima |
| October | 15 | Duas Barras | RJ | Building | WA2336479 | E. Lacerda 2 |
| October | 16 | Cachoeiras de Macacu | RJ | Nest | WA221443 | P. Jardim |
| October | 18 | São José | SC | Building | WA778197 | C. E. Nascimento |
| October | 18 | Santa Bárbara | MG | Building | WA524931 | M. Rocha |
| October | 18 | São José | SC | Building | WA777858 | A. Espig |
| October | 19 | Ubatuba | SP | Nest | WA1487539 | J. N. Santos |
| October | 20 | Joinville | SC | Nest | WA779836 | L. Moraes |
| October | 27 | Rio de Janeiro | RJ | Nest | WA811430 | L. M. Souza |
| October | 27 | Lagoa Dourada | MG | Building | WA1141877 | M. A Lima |
| October | 27 | Luminárias | MG | Nest | WA1135680 | D. Godinho |
| October | 29 | Nova Friburgo | RJ | Nest | WA231675 | R. Tinoco |
| October | 30 | Timburi | SP | Building | WA1905694 | F. Zurdo |
| October | 30 | Joinville | SC | Nest | WA2351804 | V. E. Florencio |
| October | 30 | Domingos Martins | ES | Nest | WA239054 | L. C. Araújo |
| October | 31 | Morretes | PR | Building | WA1530652 | M. Silva |
| November | 1 | Rio de Janeiro | RJ | Building | WA1551858 | E. Maciel |
| November | 2 | Lindóia | SP | Juvenile birds | WA1504645 | J. A. Prado |
| November | 3 | Mongaguá | SP | Building | WA490028 | R. Santiago |
| November | 4 | Carangola | MG | Building | WA493729 | L. F. Junior |
| November | 5 | Santo Antônio do Grama | MG | Building | WA489094 | L. R. Miranda |
| November | 7 | Camacan | BA | Building | ML75427011 | F. Schmitt |
| November | 7 | Resende | RJ | Building | WA99192 | L. Ribenboim |
| November | 7 | Brasópolis | MG | Building | WA235891 | D. Tavares |
| November | 7 | Itatiaiuçu | MG | Nest | WA85723 | D. Bandeira |
| November | 8 | Timburi | SP | Nest | WA1905659 | R. O. Elias |
| November | 10 | Domingos Martins | ES | Building | WA14982 | A. Pretti |
| November | 12 | Tiradentes | MG | Building | WA143335 | C. Lopes |
| November | 12 | Rio de Janeiro | RJ | Building | WA239804 | G. Salles |
| November | 15 | Cambuí | MG | Nest | WA243372 | F. Souza |
| November | 15 | Santa Cruz Cabrália | BA | Nestlings | WA1532308 | M. Guedes |
| November | 15 | Rio de Janeiro | RJ | Nest | WA240837 | L. Calvet |
| November | 15 | Ibiúna | SP | Nest | WA1354740 | D. Perella |
| November | 15 | Curvelo | MG | Nest | WA355592 | M. Nery |
| November | 15 | Rio de Janeiro | RJ | Building | WA972382 | L. Kagiyama |
| November | 17 | Monte Sião | MG | Nest | WA2371714 | T. T. B. Raso |
| November | 17 | Schroeder | SC | Building | WA498868 | S. Vargas |
| November | 18 | Itapoá | SC | Nest | WA82215 | R. Sobania |
| November | 19 | Sapucaia | RJ | Building | WA262684 | D. Mota |
| November | 19 | Salesópolis | SP | Nest | WA1521080 | M. Cunha |
| November | 20 | Belo Vale | MG | Nest | WA829896 | P. Mafia |
| November | 20 | Ubatuba | SP | Building | WA2388138 | J. Rosa |
| November | 25 | Dourado | SP | Building | WA521195 | M. Bueno |
| November | 26 | Rio de Janeiro | RJ | Building | ML41113111 | E. Pierobon |
| November | 27 | Rio de Janeiro | RJ | Building | WA2391543 | F. Schuler |
| November | 27 | Mairiporã | SP | Building | WA2381230 | M. C. Zumkeller |
| November | 27 | Serro | MG | Nest | WA2383708 | D. Murta |
| November | 28 | Mairiporã | RJ | Building | WA2382817 | M. C. Zumkeller |
| November | 30 | Maricá | RJ | Building | WA1182736 | L. M. De Souza |
| December | 1 | Rio de Janeiro | RJ | Juvenile birds | WA539502 | R. Augusto |
| December | 1 | Blumenau | SC | Nest | WA511044 | L. Jane |
| December | 2 | Prados | MG | Hatching | WA87239 | M. Carvalho |
| December | 2 | Jundiaí | SP | Nest | WA253952 | R. Gallacci |
| December | 6 | Rio de Janeiro | RJ | Building | WA515534 | E. Legal |
| December | 7 | Tapiraí | SP | Building | WA1177908 | M. Campos |
| December | 7 | Rio de Janeiro | RJ | Building | WA1576033 | J. P. Barreto |
| December | 7 | Rio de Janeiro | RJ | Nestlings | WA338689 | L. B. Junior |
| December | 8 | Niterói | RJ | Nest | WA2394764 | D. Magacho |
| December | 8 | Caeté | MG | Building | WA827118 | D. Avelar |
| December | 10 | Ribeirão Grande | SP | Nest | WA276596 | V. Chahin |
| December | 14 | Caputira | MG | Building | WA1562333 | G. Araujo |
| December | 17 | Carandaí | MG | Nest | WA273774 | T. Souza |
| December | 17 | Prados | MG | Nestlings | WA94279 | M. Carvalho |
| December | 18 | Itatiaia | RJ | Nest | IBC1059645 | A. Silveira |
| December | 18 | Blumenau | SC | Building | WA1954961 | R. Francisco |
| December | 18 | Prados | MG | Nestlings | WA94280 | M. Carvalho |
| December | 18 | Rio de Janeiro | RJ | Juvenile birds | WA2406256 | L. Martins |
| December | 27 | Sabinópolis | MG | Juvenile birds | WA1561945 | C. Goulart |
| December | 30 | Perdigão | MG | Building | WA1198786 | T. Oliveira |
| December | 30 | Senhora de Oliveira | MG | Building | WA540020 | W. Maciel |
| December | 30 | Maricá | RJ | Nest | WA1217003 | L. M. De Souza |
| January | 1 | Rio de Janeiro | RJ | Hatching | WA271742 | S. Costa |
| January | 1 | Esmeraldas | MG | Juvenile birds | WA351623 | M. Nery |
| January | 8 | Domingos Martins | ES | Nest | WA2440703 | L. Effgen |
| January | 11 | São Sebastião | SP | Juvenile birds | WA1221395 | S. Minato |
| January | 21 | Rio de Janeiro | RJ | Juvenile birds | WA283927 | S. Costa |
| January | 23 | Tijucas | SC | Juvenile birds | WA130072 | A. Duro |
| May | 4 | Rio de Janeiro | RJ | Building | WA344197 | J. Couto |

**Table S2.** Breeding records of members of the genus *Todirostrum.* See main text for museum acronyms.

| **Species** | **Clutch size** | **Lat** | **Long** | **Locality** | **Source** | **Museum** |
| --- | --- | --- | --- | --- | --- | --- |
| *T. chrysocrotaphum* | 2 | -1.4500 | -48.4167 | Engenho Murucutu, Belém, Pará, Brazil | (Pinto 1953) |  |
| *T. chrysocrotaphum* | 2 | -1.4500 | -48.4167 | Engenho Murucutu, Belém, Pará, Brazil | (Pinto 1953) |  |
| *T. cinereum* | 3 | 17.5667 | -89.0333 | Gallon Jug, Belize | (Russell 1964) |  |
| *T. cinereum* | 1 | -12.6833 | -38.2167 | Cetrel, Camaçari, Bahia, Brazil | (Lima et al. 2005) |  |
| *T. cinereum* | 1 | -12.6833 | -38.2167 | Cetrel, Camaçari, Bahia, Brazil | (Lima, et al. 2005) |  |
| *T. cinereum* | 2 | -12.6833 | -38.2167 | Cetrel, Camaçari, Bahia, Brazil | (Lima, et al. 2005) |  |
| *T. cinereum* | 2 | -12.6833 | -38.2167 | Cetrel, Camaçari, Bahia, Brazil | (Lima, et al. 2005) |  |
| *T. cinereum* | 2 | -12.6833 | -38.2167 | Cetrel, Camaçari, Bahia, Brazil | (Lima, et al. 2005) |  |
| *T. cinereum* | 2 | -12.6833 | -38.2167 | Cetrel, Camaçari, Bahia, Brazil | (Lima, et al. 2005) |  |
| *T. cinereum* | 3 | -12.6833 | -38.2167 | Cetrel, Camaçari, Bahia, Brazil | (Lima, et al. 2005) |  |
| *T. cinereum* | 3 | -12.6833 | -38.2167 | Cetrel, Camaçari, Bahia, Brazil | (Lima, et al. 2005) |  |
| *T. cinereum* | 3 | -12.6833 | -38.2167 | Cetrel, Camaçari, Bahia, Brazil | (Lima, et al. 2005) |  |
| *T. cinereum* | 3 | -12.6833 | -38.2167 | Cetrel, Camaçari, Bahia, Brazil | (Lima, et al. 2005) |  |
| *T. cinereum* | 3 | -12.6833 | -38.2167 | Cetrel, Camaçari, Bahia, Brazil | (Lima, et al. 2005) |  |
| *T. cinereum* | 3 | -16.7333 | -57.7500 | Fazenda Descalvado, Cáceres, Mato Grosso, Brazil | (Naumburg 1930) |  |
| *T. cinereum* | 2 | -16.0000 | -56.1833 | Near Cuiabá, Mato Grosso, Brazil |  | COMB E0180 |
| *T. cinereum* | 2 | -16.3667 | -56.2833 | Pirizal, Poconé, Mato Grosso, Brazil |  | COMB E0197 |
| *T. cinereum* | 3 | -19.8667 | -44.4167 | Campus Florestal of the Universidade Federal de Viçosa, Florestal, Minas Gerais, Brazil | D.F. Ferreira unpub. data |  |
| *T. cinereum* | 3 | -19.8667 | -44.4167 | Campus Florestal of the Universidade Federal de Viçosa, Florestal, Minas Gerais, Brazil | D.F. Ferreira unpub. data |  |
| *T. cinereum* | 3 | -19.4500 | -45.5833 | Dores do Indaiá, Minas Gerais, Brazil |  | COMB E0284 |
| *T. cinereum* | 3 | -19.4500 | -45.5833 | Dores do Indaiá, Minas Gerais, Brazil |  | COMB E0376 |
| *T. cinereum* | 2 | -10.1833 | -48.3500 | Palmas, Tocantins, Brazil |  | COMB E0348 |
| *T. cinereum* | 2 | 6.2500 | -75.5833 | Medellin, Antioquia, Colombia | (Oates and Reid 1903) | NHMUK SG 2773-4 |
| *T. cinereum* | 2 | 9.1333 | -75.8333 | Corregimiento Cotocá Arriba, a orilla de la cienega Baño, Lorica, Córdoba, Colombia |  | IAvH-CJM-4575 |
| *T. cinereum* | 2 | 3.8667 | -76.3500 | Laguna de Sonso, Buga, Valle del Cauca, Colombia |  | IAvH-CJM-4607 |
| *T. cinereum* | 2 | 3.8667 | -76.3500 | Laguna de Sonso, Buga, Valle del Cauca, Colombia |  | IAvH-CJM-4609 |
| *T. cinereum* | 2 | 10.7167 | -85.0500 | Bijagua de Upala, Alajuela, Costa Rica |  | WFVZ 141.902-2 |
| *T. cinereum* | 2 | 10.2167 | -84.4167 | Zapote, Alajuela, Costa Rica |  | WFVZ 154.833-2 |
| *T. cinereum* | 3 | 10.2167 | -84.4167 | Zapote, Alajuela, Costa Rica |  | WFVZ 154.834-3 |
| *T. cinereum* | 2 | 10.4167 | -85.0833 | Las Cañas, Guanacaste, Costa Rica |  | USNM B39804 |
| *T. cinereum* | 2 | 10.5500 | -85.4167 | Liberia, 8 km S, Guanacaste, Costa Rica |  | WFVZ 145.198-2 |
| *T. cinereum* | 3 | 10.4500 | -84.0000 | Puerto Viejo, Heredia, Costa Rica |  | WFVZ 64.491-3 |
| *T. cinereum* | 3 | 10.4333 | -84.0000 | Puerto Viejo, 2 km SW, Heredia, Costa Rica |  | WFVZ 58.452-3 |
| *T. cinereum* | 2 | 10.4667 | -84.0000 | Puerto Viejo, 3 km N, Heredia, Costa Rica |  | WFVZ 78.160-3 |
| *T. cinereum* | 3 | 10.2000 | -83.6833 | Guácimo, Limón, Costa Rica | (Carriker 1910) |  |
| *T. cinereum* | 3 | 10.2167 | -83.7833 | Guápiles, Limón, Costa Rica | (Carriker 1910) |  |
| *T. cinereum* | 2 | 8.8667 | -83.4500 | Palmar Sur, 13Km S, Puntarenas, Costa Rica |  | WFVZ 51.486-2 |
| *T. cinereum* | 2 | 8.8667 | -83.4500 | Palmar Sur, 13Km S, Puntarenas, Costa Rica |  | WFVZ 51.483-2 |
| *T. cinereum* | 2 | 8.8667 | -83.4500 | Palmar Sur, 13Km S, Puntarenas, Costa Rica |  | WFVZ 51.484-2 |
| *T. cinereum* | 3 | 8.8667 | -83.4500 | Palmar Sur, 13Km S, Puntarenas, Costa Rica |  | WFVZ 51.482-3 |
| *T. cinereum* | 2 | 8.7000 | -83.4833 | Rincón, Puntarenas, Costa Rica |  | WFVZ 58.429-2 |
| *T. cinereum* | 2 | 9.3667 | -83.6833 | El General, San José, Costa Rica | (Skutch 1930, Skutch 1945, Skutch 1960, Skutch 1976) |  |
| *T. cinereum* | 2 | 9.3667 | -83.6833 | El General, San José, Costa Rica | (Skutch 1930, Skutch 1945, Skutch 1960, Skutch 1976) |  |
| *T. cinereum* | 2 | 9.3667 | -83.6833 | El General, San José, Costa Rica | (Skutch 1930, Skutch 1945, Skutch 1960, Skutch 1976) |  |
| *T. cinereum* | 3 | 9.3667 | -83.6833 | El General, San José, Costa Rica | (Skutch 1930, Skutch 1945, Skutch 1960, Skutch 1976) |  |
| *T. cinereum* | 3 | 9.3667 | -83.6833 | El General, San José, Costa Rica | (Skutch 1930, Skutch 1945, Skutch 1960, Skutch 1976) |  |
| *T. cinereum* | 3 | 9.3667 | -83.6833 | El General, San José, Costa Rica | (Skutch 1930, Skutch 1945, Skutch 1960, Skutch 1976) |  |
| *T. cinereum* | 3 | 9.3667 | -83.6833 | El General, San José, Costa Rica | (Skutch 1930, Skutch 1945, Skutch 1960, Skutch 1976) |  |
| *T. cinereum* | 3 | 9.3667 | -83.6833 | El General, San José, Costa Rica | (Skutch 1930, Skutch 1945, Skutch 1960, Skutch 1976) |  |
| *T. cinereum* | 2 | 9.3667 | -83.6833 | El General, San José, Costa Rica |  | WFVZ 146.219-2 |
| *T. cinereum* | 3 | 9.3667 | -83.6833 | El General, San José, Costa Rica |  | WFVZ 69.311-3 |
| *T. cinereum* | 3 | 9.3667 | -83.6833 | El General, San José, Costa Rica |  | WFVZ 69.310-3 |
| *T. cinereum* | 3 | 9.3667 | -83.6833 | El General, San José, Costa Rica |  | WFVZ 69.312-3 |
| *T. cinereum* | 2 | 9.9333 | -84.1167 | San José, San José, Costa Rica | (Cherie 1890) |  |
| *T. cinereum* | 2 | 0.1000 | -79.0833 | Reserva Mangaloma, 12 km SW of Los Bancos, Pichincha, Ecuador | (Solano-Ugalde et al. 2007) |  |
| *T. cinereum* | 2 | 0.1000 | -79.0833 | Reserva Mangaloma, 12 km SW of Los Bancos, Pichincha, Ecuador | (Solano-Ugalde, et al. 2007) |  |
| *T. cinereum* | 3 | 13.7667 | -89.3500 | Lake Chanmico, El Salvador | (Dickey and Rossen 1938) |  |
| *T. cinereum* | 2 | 6.4000 | -58.6500 | Mazaruni Station, Cuyuni-Mazaruni, Guyana |  | NHMUK 1952-8-371 |
| *T. cinereum* | 2 | 6.1667 | -57.2667 | Courantyne Coast, Guyana |  | AMNH 17406 |
| *T. cinereum* | 3 | 15.7667 | -87.4667 | Telas, Atlântida, Honduras | (Skutch 1960) |  |
| *T. cinereum* | 2 | 15.7667 | -87.4667 | Telas, Atlântida, Honduras | (Skutch 1960) |  |
| *T. cinereum* | 2 | 18.9500 | -96.1833 | Veracruz 15 mi S, Veracruz, Mexico |  | WFVZ 87.335-2 |
| *T. cinereum* | 2 | 18.9500 | -96.1833 | Veracruz 15 mi S, Veracruz, Mexico |  | WFVZ 87.336-2 |
| *T. cinereum* | 3 | 14.0167 | -83.6833 | Eden Mining Company, Atlántico Norte, Nicaragua | (Huber 1932) | WFVZ 120.011-3 |
| *T. cinereum* | 2 | 12.1333 | -84.1167 | Escondido River, Atlántico Sur, Nicaragua | (Richmond 1893) | USNM B25799 |
| *T. cinereum* | 3 | 10.9333 | -83.6833 | Greytown, Río San Juan, Atlántico Sur, Nicaragua | (Richmond 1893) | USNM B25798 |
| *T. cinereum* | 2 | 9.3000 | -82.4000 | Almirante, Bocas el Toro, Panama | (Skutch 1930, Skutch 1945, Skutch 1960, Skutch 1976) |  |
| *T. cinereum* | 2 | 9.3000 | -82.4000 | Almirante, Bocas el Toro, Panama | (Skutch 1930, Skutch 1945, Skutch 1960, Skutch 1976) |  |
| *T. cinereum* | 2 | 9.3000 | -82.4000 | Almirante, Bocas el Toro, Panama | (Skutch 1930, Skutch 1945, Skutch 1960, Skutch 1976) |  |
| *T. cinereum* | 3 | 9.3000 | -82.4000 | Almirante, Bocas el Toro, Panama | (Skutch 1930, Skutch 1945, Skutch 1960, Skutch 1976) |  |
| *T. cinereum* | 3 | 9.3000 | -82.4000 | Almirante, Bocas el Toro, Panama | (Skutch 1930, Skutch 1945, Skutch 1960, Skutch 1976) |  |
| *T. cinereum* | 3 | 9.3000 | -82.4000 | Almirante, Bocas el Toro, Panama | (Skutch 1930, Skutch 1945, Skutch 1960, Skutch 1976) |  |
| *T. cinereum* | 3 | 9.3000 | -82.4000 | Almirante, Bocas el Toro, Panama | (Skutch 1930, Skutch 1945, Skutch 1960, Skutch 1976) |  |
| *T. cinereum* | 3 | 9.3000 | -82.4000 | Almirante, Bocas el Toro, Panama | (Skutch 1930, Skutch 1945, Skutch 1960, Skutch 1976) |  |
| *T. cinereum* | 3 | 9.0667 | -79.6333 | Cerro Tigre, Canal Zone, Panama | (Wetmore 1972) | USNM B41614 |
| *T. cinereum* | 3 | 9.0167 | -79.6167 | Pedro Miguel Locks, Canal Zone, Panama | (Wetmore 1972) | USNM B41613 |
| *T. cinereum* | 3 | 9.0667 | -79.6500 | Summit, Canal Zone, Panama | (Wetmore 1972) | USNM B41612 |
| *T. cinereum* | 2 | 9.2667 | -79.9167 | Gatún, Colón, Panama | (Stone 1918) |  |
| *T. cinereum* | 2 | 9.2667 | -79.9167 | Gatún, Colón, Panama | (Stone 1918) |  |
| *T. cinereum* | 3 | 9.2500 | -79.9167 | Miraflores, Colón, Panama | (Stone 1918) | USNM B36387 |
| *T. cinereum* | 2 | 9.0500 | -79.1667 | La Jagua, Panama, Panama | (Wetmore 1972) | USNM B41782 |
| *T. cinereum* | 3 | 9.1667 | -79.8333 | Slothia Island, Panama, Panama |  | AMNH 1655 |
| *T. cinereum* | 2 | -11.0667 | -75.3333 | Chanchamayo, Junín, Peru |  | NMSZ 859 |
| *T. cinereum* | 2 | -5.8833 | -79.9833 | Las Pampas, Lambayeque, Peru |  | WFVZ 178.614-2 |
| *T. cinereum* | 2 | 5.8333 | -55.1667 | Paramaribo, Paramaribo, Surinam | (Penard and Penard 1910) | NBCN 184352 |
| *T. cinereum* | 2 | 5.8333 | -55.1667 | Paramaribo, Paramaribo, Surinam | (Penard and Penard 1910) | NHMUK 1916.13.3.1-5 |
| *T. cinereum* | 2 | 5.8333 | -55.1667 | Paramaribo, Paramaribo, Surinam | (Haverschmidt 1978) |  |
| *T. cinereum* | 2 | 5.8333 | -55.1667 | Paramaribo, Paramaribo, Surinam | (Haverschmidt 1978) |  |
| *T. cinereum* | 2 | 5.8333 | -55.1667 | Paramaribo, Paramaribo, Surinam | (Haverschmidt 1978) |  |
| *T. cinereum* | 2 | 5.8333 | -55.1667 | Paramaribo, Paramaribo, Surinam | (Haverschmidt 1978) |  |
| *T. cinereum* | 2 | 5.8333 | -55.1667 | Paramaribo, Paramaribo, Surinam | (Haverschmidt 1978) |  |
| *T. cinereum* | 2 | 5.8333 | -55.1667 | Paramaribo, Paramaribo, Surinam | (Haverschmidt 1978) |  |
| *T. cinereum* | 2 | 5.8333 | -55.1667 | Paramaribo, Paramaribo, Surinam | (Haverschmidt 1978) |  |
| *T. cinereum* | 2 | 5.8333 | -55.1667 | Paramaribo, Paramaribo, Surinam | (Haverschmidt 1978) |  |
| *T. cinereum* | 2 | 5.8333 | -55.1667 | Paramaribo, Paramaribo, Surinam | (Haverschmidt 1978) |  |
| *T. cinereum* | 2 | 5.8333 | -55.1667 | Paramaribo, Paramaribo, Surinam | (Haverschmidt 1978) |  |
| *T. cinereum* | 2 | 5.8333 | -55.1667 | Paramaribo, Paramaribo, Surinam | (Haverschmidt 1978) |  |
| *T. cinereum* | 2 | 5.8333 | -55.1667 | Paramaribo, Paramaribo, Surinam | (Haverschmidt 1978) |  |
| *T. cinereum* | 2 | 5.8333 | -55.1667 | Paramaribo, Paramaribo, Surinam | (Haverschmidt 1978) |  |
| *T. cinereum* | 2 | 5.8333 | -55.1667 | Paramaribo, Paramaribo, Surinam | (Haverschmidt 1978) |  |
| *T. cinereum* | 2 | 5.8333 | -55.1667 | Paramaribo, Paramaribo, Surinam | (Haverschmidt 1978) |  |
| *T. cinereum* | 2 | 5.8333 | -55.1667 | Paramaribo, Paramaribo, Surinam | (Haverschmidt 1978) |  |
| *T. cinereum* | 2 | 5.8333 | -55.1667 | Paramaribo, Paramaribo, Surinam | (Haverschmidt 1978) |  |
| *T. cinereum* | 2 | 5.8333 | -55.1667 | Paramaribo, Paramaribo, Surinam | (Haverschmidt 1978) |  |
| *T. cinereum* | 2 | 5.8333 | -55.1667 | Paramaribo, Paramaribo, Surinam | (Haverschmidt 1978) |  |
| *T. cinereum* | 2 | 5.8333 | -55.1667 | Paramaribo, Paramaribo, Surinam | (Haverschmidt 1978) |  |
| *T. cinereum* | 2 | 5.8333 | -55.1667 | Paramaribo, Paramaribo, Surinam | (Haverschmidt 1978) |  |
| *T. cinereum* | 3 | 5.8333 | -55.1667 | Paramaribo, Paramaribo, Surinam | (Penard and Penard 1910) | NHMUK 1941-9-4-2092 |
| *T. cinereum* | 3 | 5.8333 | -55.1667 | Paramaribo, Paramaribo, Surinam | (Penard and Penard 1910) | NHMUK 1941-9-4-2091 |
| *T. cinereum* | 2 | 5.8333 | -55.1667 | Paramaribo?, Paramaribo?, Surinam | (Penard and Penard 1910) | NBCN 184332 |
| *T. cinereum* | 2 | 5.8333 | -55.1667 | Paramaribo?, Paramaribo?, Surinam | (Penard and Penard 1910) | NBCN 184338 |
| *T. cinereum* | 2 | 5.8333 | -55.1667 | Paramaribo?, Paramaribo?, Surinam | (Penard and Penard 1910) | NBCN 184349 |
| *T. cinereum* | 2 | 5.8333 | -55.1667 | Paramaribo?, Paramaribo?, Surinam | (Penard and Penard 1910) | NBCN 184351 |
| *T. cinereum* | 2 | 5.8333 | -55.1667 | Paramaribo?, Paramaribo?, Surinam | (Penard and Penard 1910) | NBCN 184360 |
| *T. cinereum* | 2 | 5.8333 | -55.1667 | Paramaribo?, Paramaribo?, Surinam | (Penard and Penard 1910) | NBCN 184367 |
| *T. cinereum* | 2 | 5.8333 | -55.1667 | Paramaribo?, Paramaribo?, Surinam | (Penard and Penard 1910) | NBCN 184368 |
| *T. cinereum* | 2 | 5.8333 | -55.1667 | Paramaribo?, Paramaribo?, Surinam | (Penard and Penard 1910) | NBCN 184381 |
| *T. cinereum* | 2 | 5.8333 | -55.1667 | Paramaribo?, Paramaribo?, Surinam | (Penard and Penard 1910) | NBCN 184384 |
| *T. cinereum* | 2 | 5.8333 | -55.1667 | Paramaribo?, Paramaribo?, Surinam | (Penard and Penard 1910) | NBCN 184392 |
| *T. cinereum* | 2 | 5.8333 | -55.1667 | Paramaribo?, Paramaribo?, Surinam | (Penard and Penard 1910) | NBCN 184398 |
| *T. cinereum* | 2 | 5.8333 | -55.1667 | Paramaribo?, Paramaribo?, Surinam | (Penard and Penard 1910) | NBCN 184403 |
| *T. cinereum* | 2 | 5.8333 | -55.1667 | Paramaribo?, Paramaribo?, Surinam | (Penard and Penard 1910) | NBCN 184411 |
| *T. cinereum* | 2 | 5.8333 | -55.1667 | Paramaribo?, Paramaribo?, Surinam | (Penard and Penard 1910) | NBCN 184418 |
| *T. cinereum* | 3 | 5.8333 | -55.1667 | Paramaribo?, Paramaribo?, Surinam | (Penard and Penard 1910) | NBCN 184413 |
| *T. cinereum* | 2 | 7.7500 | -68.8667 | Hato el Frío, Llanos de Apure, Apure, Venezuela | (Cruz and Andrews 1989) |  |
| *T. cinereum* | 2 | 7.7500 | -68.8667 | Hato el Frío, Llanos de Apure, Apure, Venezuela | (Cruz and Andrews 1989) |  |
| *T. cinereum* | 2 | 7.7500 | -68.8667 | Hato el Frío, Llanos de Apure, Apure, Venezuela | (Cruz and Andrews 1989) |  |
| *T. cinereum* | 2 | 7.7500 | -68.8667 | Hato el Frío, Llanos de Apure, Apure, Venezuela | (Cruz and Andrews 1989) |  |
| *T. cinereum* | 2 | 7.7500 | -68.8667 | Hato el Frío, Llanos de Apure, Apure, Venezuela | (Cruz and Andrews 1989) |  |
| *T. cinereum* | 2 | 7.7500 | -68.8667 | Hato el Frío, Llanos de Apure, Apure, Venezuela | (Cruz and Andrews 1989) |  |
| *T. cinereum* | 3 | 7.7500 | -68.8667 | Hato el Frío, Llanos de Apure, Apure, Venezuela | (Cruz and Andrews 1989) |  |
| *T. cinereum* | 3 | 7.7500 | -68.8667 | Hato el Frío, Llanos de Apure, Apure, Venezuela | (Cruz and Andrews 1989) |  |
| *T. cinereum* | 3 | 7.7500 | -68.8667 | Hato el Frío, Llanos de Apure, Apure, Venezuela | (Cruz and Andrews 1989) |  |
| *T. cinereum* | 3 | 7.7500 | -68.8667 | Hato el Frío, Llanos de Apure, Apure, Venezuela | (Cruz and Andrews 1989) |  |
| *T. cinereum* | 3 | 7.7500 | -68.8667 | Hato el Frío, Llanos de Apure, Apure, Venezuela | (Cruz and Andrews 1989) |  |
| *T. cinereum* | 3 | 7.7500 | -68.8667 | Hato el Frío, Llanos de Apure, Apure, Venezuela | (Cruz and Andrews 1989) |  |
| *T. cinereum* | 3 | 7.6167 | -66.1667 | Caicara, Orinoco River, Bolívar, Venezuela | (Cherie 1916) | WFVZ 118.542-3 |
| *T. cinereum* | 3 | 7.6167 | -66.1667 | Caicara, Orinoco River, Bolívar, Venezuela | (Cherie 1916) | WFVZ 120.129-3 |
| *T. cinereum* | 3 | 7.6167 | -66.1667 | Caicara, Orinoco River, Bolívar, Venezuela | (Cherie 1916) |  |
| *T. cinereum* | 2 | 10.1333 | -62.9333 | Guanoco, Sucre, Venezuela |  | NHMUK 1952-8-372 |
| *T. maculatum* | 2 | -9.9500 | -67.8667 | Campus da Universidade Federal do Acre, Rio Branco, Acre, Brazil |  | COMB E0146 |
| *T. maculatum* | 2 | -0.1667 | -49.9167 | Chaves, Ilha de Marajó, Pará, Brazil |  | MPEG 488.489 |
| *T. maculatum* | 2 | -1.4500 | -48.4167 | Engenho Murucutu, Belém, Pará, Brazil | (Pinto 1953) |  |
| *T. maculatum* | 2 | -1.1333 | -48.4500 | Mosqueiro, Pará, Brazil | (Pinto 1953) |  |
| *T. maculatum* | 2 | -1.4500 | -48.4667 | Museu Paraense Emílio Goeldi, Belém, Pará, Brazil | (Goeldi 1897) |  |
| *T. maculatum* | 2 | -1.4500 | -48.4667 | Museu Paraense Emílio Goeldi, Belém, Pará, Brazil | (Marceliano 1982) |  |
| *T. maculatum* | 2 | -1.4500 | -48.4667 | Museu Paraense Emílio Goeldi, Belém, Pará, Brazil | (Marceliano 1982) |  |
| *T. maculatum* | 2 | -1.4500 | -48.4667 | Museu Paraense Emílio Goeldi, Belém, Pará, Brazil | (Marceliano 1982) |  |
| *T. maculatum* | 2 | -1.4500 | -48.4667 | Museu Paraense Emílio Goeldi, Belém, Pará, Brazil | (Marceliano 1982) |  |
| *T. maculatum* | 2 | -1.4500 | -48.4667 | Museu Paraense Emílio Goeldi, Belém, Pará, Brazil | (Marceliano 1982) |  |
| *T. maculatum* | 2 | -1.4500 | -48.4667 | Museu Paraense Emílio Goeldi, Belém, Pará, Brazil | (Marceliano 1982) |  |
| *T. maculatum* | 2 | -1.1000 | -50.5167 | Rio Aramã, Pará, Brazil |  | MPEG 470.471 |
| *T. maculatum* | 2 | -1.3000 | -47.5833 | Santo Antônio do Prata, Pará, Brazil |  | MPEG 468.469 |
| *T. maculatum* | 2 | -1.3167 | -69.5667 | sector La Pista, Corregimiento La Pedrera, Amazonas, Colombia |  | IAvH-CJM-4634 |
| *T. maculatum* | 3 | 4.4833 | -52.0333 | Mangrove de Kaw, Kaw, French Guiana |  | MNHN not numbered |
| *T. maculatum* | 1 | 5.8333 | -55.1667 | Paramaribo, Paramaribo, Surinam | (Haverschmidt 1955) |  |
| *T. maculatum* | 1 | 5.8333 | -55.1667 | Paramaribo, Paramaribo, Surinam | (Haverschmidt 1955) |  |
| *T. maculatum* | 2 | 5.8333 | -55.1667 | Paramaribo, Paramaribo, Surinam | (Penard and Penard 1910) | NBCN 184423 |
| *T. maculatum* | 2 | 5.8333 | -55.1667 | Paramaribo, Paramaribo, Surinam | (Penard and Penard 1910) | NBCN 184437 |
| *T. maculatum* | 2 | 5.8333 | -55.1667 | Paramaribo, Paramaribo, Surinam | (Haverschmidt 1955) |  |
| *T. maculatum* | 2 | 5.8333 | -55.1667 | Paramaribo, Paramaribo, Surinam | (Haverschmidt 1955) |  |
| *T. maculatum* | 2 | 5.8333 | -55.1667 | Paramaribo, Paramaribo, Surinam | (Haverschmidt 1955) |  |
| *T. maculatum* | 2 | 5.8333 | -55.1667 | Paramaribo, Paramaribo, Surinam | (Haverschmidt 1955) |  |
| *T. maculatum* | 2 | 5.8333 | -55.1667 | Paramaribo, Paramaribo, Surinam | (Haverschmidt 1955) |  |
| *T. maculatum* | 2 | 5.8333 | -55.1667 | Paramaribo, Paramaribo, Surinam | (Haverschmidt 1955) |  |
| *T. maculatum* | 2 | 5.8333 | -55.1667 | Paramaribo, Paramaribo, Surinam | (Haverschmidt 1955) |  |
| *T. maculatum* | 2 | 5.8333 | -55.1667 | Paramaribo, Paramaribo, Surinam | (Haverschmidt 1955) |  |
| *T. maculatum* | 2 | 5.8333 | -55.1667 | Paramaribo, Paramaribo, Surinam | (Haverschmidt 1955) |  |
| *T. maculatum* | 2 | 5.8333 | -55.1667 | Paramaribo, Paramaribo, Surinam | (Penard and Penard 1910) | ZMB 524a |
| *T. maculatum* | 2 | 5.8333 | -55.1667 | Paramaribo?, Paramaribo?, Surinam | (Penard and Penard 1910) | NBCN 184440 |
| *T. maculatum* | 2 | 5.8333 | -55.1667 | Paramaribo?, Paramaribo?, Surinam | (Penard and Penard 1910) | NBCN 184439 |
| *T. maculatum* | 2 | 5.8333 | -55.1667 | Paramaribo?, Paramaribo?, Surinam | (Penard and Penard 1910) | NBCN 184443 |
| *T. maculatum* | 2 | 5.8333 | -55.1667 | Paramaribo?, Paramaribo?, Surinam | (Penard and Penard 1910) | NBCN 184446 |
| *T. maculatum* | 2 | 5.8500 | -55.8833 | Saramacca river, Surinam | (Penard and Penard 1910) | NBCN 184421 |
| *T. maculatum* | 2 | 10.0833 | -62.9500 | Río San Juan, Guanoco, Sucre, Venezuela |  | NHMUK 1952-8-369 |
| *T. pictum* | 2 | 5.8333 | -55.1667 | Paramaribo, Paramaribo, Surinam | (Penard and Penard 1910) | NBCN 184447 |
| *T. pictum* | 2 | 5.8333 | -55.1667 | Paramaribo, Paramaribo, Surinam | (Penard and Penard 1910) | NBCN 184449 |
| *T. pictum* | 2 | 5.8333 | -55.1667 | Paramaribo?, Paramaribo?, Surinam | (Penard and Penard 1910) | NBCN 184448 |
| *T. poliocephalum* | 2 | -20.2833 | -45.5333 | Arcos, Minas Gerais, Brazil |  | MNRJ 4746 |
| *T. poliocephalum* | 2 | -20.2833 | -45.5333 | Arcos, Minas Gerais, Brazil |  | MNRJ 4744 |
| *T. poliocephalum* | 2 | -20.2833 | -45.5333 | Arcos, Minas Gerais, Brazil |  | MNRJ 4745 |
| *T. poliocephalum* | 3 | -20.2833 | -45.5333 | Arcos, Minas Gerais, Brazil |  | MNRJ 4763 |
| *T. poliocephalum* | 2 | -20.2833 | -45.5333 | Arcos?, Minas Gerais, Brazil | (Skinner 1924) |  |
| *T. poliocephalum* | 3 | -20.0000 | -43.9833 | Área de Proteção Especial de Mananciais do Barreiro, Belo Horizonte, Minas Gerais, Brazil | (Marini et al. 2007) |  |
| *T. poliocephalum* | 2 | -19.8667 | -44.4167 | Campus Florestal of the Universidade Federal de Viçosa, Florestal, Minas Gerais, Brazil | this study |  |
| *T. poliocephalum* | 3 | -19.8667 | -44.4167 | Campus Florestal of the Universidade Federal de Viçosa, Florestal, Minas Gerais, Brazil | this study |  |
| *T. poliocephalum* | 2 | -19.8667 | -44.4167 | Campus Florestal of the Universidade Federal de Viçosa, Florestal, Minas Gerais, Brazil | this study |  |
| *T. poliocephalum* | 2 | -18.8667 | -44.4167 | Campus Florestal of the Universidade Federal de Viçosa, Florestal, Minas Gerais, Brazil | this study |  |
| *T. poliocephalum* | 3 | -19.8667 | -44.4167 | Campus Florestal of the Universidade Federal de Viçosa, Florestal, Minas Gerais, Brazil | this study |  |
| *T. poliocephalum* | 3 | -19.8667 | -44.4167 | Campus Florestal of the Universidade Federal de Viçosa, Florestal, Minas Gerais, Brazil | this study |  |
| *T. poliocephalum* | 3 | -19.8667 | -44.4167 | Campus Florestal of the Universidade Federal de Viçosa, Florestal, Minas Gerais, Brazil | this study |  |
| *T. poliocephalum* | 3 | -19.8667 | -44.4167 | Campus Florestal of the Universidade Federal de Viçosa, Florestal, Minas Gerais, Brazil | this study |  |
| *T. poliocephalum* | 3 | -19.8667 | -44.4167 | Campus Florestal of the Universidade Federal de Viçosa, Florestal, Minas Gerais, Brazil | this study |  |
| *T. poliocephalum* | 3 | -19.8667 | -44.4167 | Campus Florestal of the Universidade Federal de Viçosa, Florestal, Minas Gerais, Brazil | this study |  |
| *T. poliocephalum* | 3 | -19.8667 | -44.4167 | Campus Florestal of the Universidade Federal de Viçosa, Florestal, Minas Gerais, Brazil | this study |  |
| *T. poliocephalum* | 2 | -20.0333 | -44.4167 | Fazenda Cachoeira, Azurita, Mateus Leme, Minas Gerais, Brazil | (Ferreira and Lopes 2016) |  |
| *T. poliocephalum* | 3 | -21.9667 | -42.3667 | Cantagalo, Rio de Janeiro, Brazil | (Euler 1900) |  |
| *T. poliocephalum* | 2 | -26.5000 | -49.0000 | Unspecified locality, Santa Catarina, Brazil |  | NMW not numbered |
| *T. poliocephalum* | 3 | -24.7167 | -47.5500 | Iguape, São Paulo, Brazil |  | NMW 13776 |
| *T. poliocephalum* | 2 | -23.7833 | -45.4167 | São Sebastião, São Paulo, Brazil |  | MZUSP 1206 |
| *T. poliocephalum* | 2 | -24.7167 | -47.5500 | Iguape, São Paulo , Brazil | (Oates and Reid 1903) | NHMUK 1901-11-30-351-352 |
| *T. viridanum* | 2 | 11.3833 | -69.6833 | Around the town of Coro, Falcón, Venezuela | (Rodríguez-Ferraro and Azpiroz 2006) |  |
| *T. viridanum* | 2 | 11.3833 | -69.6833 | Around the town of Coro, Falcón, Venezuela | (Rodríguez-Ferraro and Azpiroz 2006) |  |
| *T. viridanum* | 3 | 11.3833 | -69.6833 | Around the town of Coro, Falcón, Venezuela | (Rodríguez-Ferraro and Azpiroz 2006) |  |
| *T. viridanum* | 3 | 11.3833 | -69.6833 | Around the town of Coro, Falcón, Venezuela | (Rodríguez-Ferraro and Azpiroz 2006) |  |
| *T. viridanum* | 3 | 11.3833 | -69.6833 | Around the town of Coro, Falcón, Venezuela | (Rodríguez-Ferraro and Azpiroz 2006) |  |
| *T. viridanum* | 3 | 11.3833 | -69.6833 | Around the town of Coro, Falcón, Venezuela | (Rodríguez-Ferraro and Azpiroz 2006) |  |
| *T. viridanum* | 3 | 11.3833 | -69.6833 | Around the town of Coro, Falcón, Venezuela | (Rodríguez-Ferraro and Azpiroz 2006) |  |

**References**

Carriker MA, Jr. 1910. An annotated list of the birds of Costa Rica including Cocos Island. Ann Carnegie Mus. 6:314-915.

Cherie GK. 1890. Notes on the nesting habits of several birds at San José, Costa Rica. Auk. 7:233-237.

Cherie GK. 1916. A contribution to the ornithology of the Orinoco region. Mus Brooklyn Inst Arts Sci, Sci Bull. 2:133-374.

Cruz A, Andrews RW. 1989. Observations on the breeding biology of passerines in a seasonally flooded savanna in Venezuela. Wilson Bull.101:62-76.

Dickey DR, Rossen AJ, van. 1938. The birds of El Salvador. Field Mus Nat Hist Publ Zool Ser. 23:1-609.

Euler C. 1900. Descripção de ninhos e ovos das aves do Brasil. Rev Mus Paulista. 4:9-148.

Ferreira DF, Lopes LE. 2016. Notas sobre a biologia reprodutiva de aves no estado de Minas Gerais, Brasil. Atual Ornitol. 194:33-41.

Goeldi EA. 1897. On the nesting of *Cassicus persicus*, *Cassidix oryzivora*, *Gymnomystax melanicterus*, and *Todirostrum maculatum*. The Ibis, 7th series.3:361-370.

Haverschmidt F. 1955. Notes on the life history of *Todirostrum maculatum* in Surinam. Auk.72:325-331.

Haverschmidt F. 1978. The duration of parental care in the Common Tody Flycatcher. Auk.95:199.

Huber W. 1932. Birds collected in northeastern Nicaragua in 1922. Proc Acad Nat Sci Philad.84:205-249.

Lima PC, Santos SS, Pita BG, Santos DC. 2005. Reprodução de *Todirostrum cinereum* em área de cerrado no oeste da Bahia, Brasil. Atualidades Ornitológicas On-line.124:1-33.

Marceliano MLV. 1982. Notas sobre o comportamento reprodutivo de *Todirostrum maculatum* (Desmarest, 1806). Bol Mus Para Emílio Goeldi Ser Zool.115:1-21.

Marini MÂ, Aguilar TM, Andrade RD, Leite LO, Anciães M, Carvalho CEA, Duca C, Maldonado-Coelho M, Sebaio F, Gonçalves J. 2007. Biologia da nidificação de aves do sudeste de Minas Gerais, Brasil. Rev Bras Ornitol.15:367-376.

Naumburg EMB. 1930. The birds of Mato Grosso, Brazil: a report on the birds secured by the Roosevelt-Rondon expedition. Bull Am Mus Nat Hist.60:1-432.

Oates EW, Reid SG. 1903. Catalogue of the collection of birds' eggs in the British Museum (Natural History), vol. III, Carinatae (Psittaciformes-Passeriformes) London, UK: British Museum.

Penard FP, Penard AP. 1910. Des vogels van Guyana (Suriname, Cayenne en Demerara), vol. 2 The Hague, Netherlands: Martinus Nijhoff

Pinto OMO. 1953. Sobre a coleção Carlos Estevão de peles, ninhos e ovos das aves de Belém (Pará). Pap Avulsos Dep Zool.11:111-222.

Richmond CW. 1893. Notes on a collection of birds from eastern Nicaragua and the Rio Frio, Costa Rica, with a description of a supposed new trogon. Proc U S Nat Mus.16:479-532.

Rodríguez-Ferraro A, Azpiroz AB. 2006. Notes on the breeding biology of Maracaibo Tody-flycatcher *Todirostrum viridanum*. Cotinga.25:18-20.

Russell SM. 1964. Distributional study of the birds of British Honduras. Ornithol Monogr.1:1-195.

Skinner KL. 1924. Notes on eggs from Minas Gerais, Brazil. The Oologists' Record.4:11-20.

Skutch AF. 1930. The habits and nesting activities of the Northern Tody Flycatcher in Panama. Auk.47:313-322.

Skutch AF. 1945. Incubation and nestling periods of Central American birds. Auk.62:8-37.

Skutch AF. 1960. Life histories of Central American birds II, families Vireonidae, Sylviidae, Turdidae, Troglodytidae, Paridae, Corvidae, Hirundinidae and Tyrannidae. Pac Coast Avif.34:1-593.

Skutch AF. 1976. Parent birds and their youngs: University of Texas Press.

Solano-Ugalde A, Arcos-Torres A, Greeney HF. 2007. Additional breeding records for selected avian species in northwest Ecuador. Boletín de la Sociedad Antioqueña de Ornitología.1:17-25.

Stone W. 1918. Birds of the Panama canal zone, with special reference to a collection made by Mr. Lindsey L. Jewel. Proc Acad Nat Sci Philad.70:239-280.

Wetmore A. 1972. The birds of the Republic of Panamá, part 3, Passeriformes: Dendrocolaptidae (Woodcreepers) to Oxyruncidae (Sharpbills). Smith Misc Collect.150:1-631.
